# Supplementary material for: Characterization of Triniti virus supports its reclassification in the family Peribunyaviridae
Source: PubMed Central journal article supplement (PMC7011695; doi:10.1099/jgv.0.001196), 2018-12-14
Supplement: jgv-100-137-s001.pdf [file jgv-100-137-s001.pdf]

**Supplementary Table 1:** Description of viruses from families *Peribunyaviridae* and *Phenuiviridae* used in the complement fixation tests with *Triniti virus* isolates, evaluating the serologic relationship between these viruses.

| <b>FAMILY</b>           | <b>ANTIGENIC GROUP</b>   | <b>VIRUS</b>                                                                                                                                                                                             |
|-------------------------|--------------------------|----------------------------------------------------------------------------------------------------------------------------------------------------------------------------------------------------------|
| <i>PERIBUNYAVIRIDAE</i> | <b>Anopheles A</b>       | Arumateua, Caraipé, Lukini, Tacaiuma, Trombetas, Tucuruí,                                                                                                                                                |
|                         | <b>Group C</b>           | Apeú, Caraparú, Itaquí, Marituba, Murutucú, Nepuyo, Oriboca, Caraparú-like,                                                                                                                              |
|                         | <b>Califórnia</b>        | Guaroa, Melao, Serra do navio                                                                                                                                                                            |
|                         | <b>Bunyamwera</b>        | Iaco, Kairi, Macauã, Maguari, Sororoca, Tucunduba, Taiassui, Xingu                                                                                                                                       |
|                         | <b>Guamá</b>             | Ananindeua, Bimiti, Catú, Guamá, Mirim, Mojú, Timboteua                                                                                                                                                  |
|                         | <b>Simbu</b>             | Jatobal, Oropouche, Utinga                                                                                                                                                                               |
|                         | <b>Gamboa</b>            | Gamboa-like                                                                                                                                                                                              |
|                         | <b>Turlock</b>           | Turlock                                                                                                                                                                                                  |
| <i>PHENUIVIRIDAE</i>    | <b>Capim</b>             | Acará, Benevides, Benfica, Bush Bush, Capim, Guajará, Moriche                                                                                                                                            |
|                         | <b>Phlebotomus fever</b> | Alenquer, Ambé, Anhangá, Ariquemes, Belterra, Bujarú, Candirú, Icoaraci, Itaituba, Itaporanga, Jacundá, Joá, Morumbi, Mucura, Munguba, Oriximiná, Salobo, Serra Norte, Tapará, Turuna, Uriurana, Urucuri |

**Supplementary table 2:** Characteristics for S, M and L genome segments of *Trinita virus*. Analysis was performed using sense 5' to 3'.

| ISOLATE           | 5' NCR       | TERMINAL SEQUENCE       | N                            | M POLYPROTEIN                    |                      |                      | L POLYPROTEIN                   | 3' NCR       | TERMINAL SEQUENCE       | Total    |
|-------------------|--------------|-------------------------|------------------------------|----------------------------------|----------------------|----------------------|---------------------------------|--------------|-------------------------|----------|
|                   |              |                         |                              | Gn                               | Nsm                  | Gc                   |                                 |              |                         |          |
| <b>BeAN235467</b> | 42nt         | AGTAGTGTACTCCACTTAAA... | 747 nt<br>248aa<br>(28.5kDa) | NA                               | NA                   | NA                   | NA                              | 300 nt       | ...TTTAAGTGGAGCACACTACT | 1.089 nt |
| <b>BeAR800584</b> | 42nt         | AGTAGTGTACTCCACTTAAA... | 747 nt<br>248aa<br>(28.5kDa) | NA                               | NA                   | NA                   | NA                              | 305 nt       | ...TTTAAGTGGAGCACACTACT | 1.094 nt |
| <b>TVRL 7994</b>  | 42nt         | AGTAGTGTACTCCACTTAAA... | 747 nt<br>248aa<br>(28.5kDa) | NA                               | NA                   | NA                   | NA                              | 299 nt       | ...TTTAAGTGGAGCACACTACT | 1.088 nt |
|                   |              |                         |                              | ORF: 4.335 nt/1.444 aa/163.3 kDa |                      |                      |                                 |              |                         |          |
| <b>BeAN235467</b> | 59nt         | AGTAGTGTACTACTTGGAAA... | NA                           | 284 aa<br>(32.3 kDa)             | 167aa<br>(18.8 kDa)  | 861aa<br>(97.5 kDa)  | NA                              | 469 nt       | ...TTTCCAAGTAGTATACTACT | 4.863 nt |
| <b>BeAR800584</b> | 59nt         | AGTAGTGTACTACTTGGAAA... | NA                           | 284 aa<br>(32.3 kDa)             | 167aa<br>(18.8 kDa)  | 861aa<br>(97.5 kDa)  | NA                              | 469 nt       | ...TTTCCAAGTAGTATACTACT | 4.863 nt |
| <b>TVRL 7994</b>  | 59nt         | AGTAGTGTACTACTTGGAAA... | NA                           | 284 aa<br>(32.3 kDa)             | 284 aa<br>(32.3 kDa) | 284 aa<br>(32.3 kDa) | NA                              | Not complete |                         | 4.737 nt |
| <b>BeAN235467</b> | 33 nt        | AGTAGTGTGCTCCTATCAAT... | NA                           | NA                               | NA                   | NA                   | 6.732nt<br>2.243aa<br>(261 kDa) | 142 nt       | ...ATTGATAGGAGCACACTACT | 6.907 nt |
| <b>BeAR800584</b> | 33 nt        | AGTAGTGTGCTCCTATCAAT... | NA                           | NA                               | NA                   | NA                   | 6.732nt<br>2.243aa<br>(261 kDa) | 142 nt       | ...ATTGATAGGAGCACACTACT | 6.907 nt |
| <b>TVRL 7994</b>  | not complete | -----GTGCTCCTATCAAT...  | NA                           | NA                               | NA                   | NA                   | 6.732nt<br>2.243aa<br>(261 kDa) | Not complete | ...ATTGATAGGAGCAC-----  | 6.868nt  |

\*NCR: Non coding region; NA: Not applicable; ORF: Open reading frame; nt: nucleotide; aa: Amino acid;
